# Supplementary material for: More losers than winners in a century of future Southern Ocean seafloor warming
Source: Springer Nature journal article supplement (doi:10.1038/nclimate3377), 2017-09-04
Supplement: 41558_2017_BFnclimate3377_MOESM1_ESM.pdf [file 41558_2017_BFnclimate3377_MOESM1_ESM.pdf]

In the format provided by the authors and unedited.

# More losers than winners in a century of future Southern Ocean seafloor warming

Huw J. Griffiths\*, Andrew J. S. Meijers and Thomas J. Bracegirdle

---

British Antarctic Survey, Cambridge CB3 0ET, UK. \*e-mail: [hjg@bas.ac.uk](mailto:hjg@bas.ac.uk)

**Supplementary Table 1.** Models represented in the ensemble for present day and 2099 (RCP8.5). \* = Models used for 2200 ensemble (RCP8.5).

| Modeling Center                        | Model          | Institution                                                                                                                           |
|----------------------------------------|----------------|---------------------------------------------------------------------------------------------------------------------------------------|
| BCC                                    | BCC-CSM1.1*    | Beijing Climate Center, China Meteorological Administration                                                                           |
|                                        | BCC-CSM1.1(m)  |                                                                                                                                       |
| CCCma                                  | CanESM2        | Canadian Centre for Climate Modelling and Analysis                                                                                    |
| CSIRO-QCCCE                            | CSIRO-Mk3.6.0* | Commonwealth Scientific and Industrial Research Organisation in collaboration with the Queensland Climate Change Centre of Excellence |
| INM                                    | INM-CM4        | Institute for Numerical Mathematics                                                                                                   |
| IPSL                                   | IPSL-CM5A-LR*  | Institut Pierre-Simon Laplace                                                                                                         |
|                                        | IPSL-CM5A-MR   |                                                                                                                                       |
|                                        | IPSL-CM5B-LR   |                                                                                                                                       |
| MOHC (additional realizations by INPE) | HadGEM2-CC     | Met Office Hadley Centre (additional HadGEM2-ES realizations contributed by Instituto Nacional de Pesquisas Espaciais)                |
|                                        | HadGEM2-ES*    |                                                                                                                                       |
| NASA GISS                              | GISS-E2-H*     | NASA Goddard Institute for Space Studies                                                                                              |
|                                        | GISS-E2-H-CC   |                                                                                                                                       |
|                                        | GISS-E2-R*     |                                                                                                                                       |
|                                        | GISS-E2-R-CC   |                                                                                                                                       |
| NCAR                                   | CESM1-CAM5     | National Center for Atmospheric Research                                                                                              |
| NCC                                    | NorESM1-M      | Norwegian Climate Centre                                                                                                              |
|                                        | NorESM1-ME     |                                                                                                                                       |
| NOAA GFDL                              | GFDL-ESM2G     | Geophysical Fluid Dynamics Laboratory                                                                                                 |
|                                        | GFDL-ESM2M     |                                                                                                                                       |

**Supplementary Table 2.** Groupings of seafloor invertebrates from south of 40 °S, grouped by >80% similarity in their thermal distribution patterns.

| Group | Minimum Temperature | Maximum Temperature | No. of Species | Example Species                                                                            |
|-------|---------------------|---------------------|----------------|--------------------------------------------------------------------------------------------|
| 1     | 7.4                 | 10.3                | 3              | <i>Thaumatometra alternata</i> , <i>Tawera sphaericula</i>                                 |
| 2     | 2.4                 | 18.5                | 135            | <i>Lithodes santolla</i> , <i>Mytilus edulis</i> , <i>Henricia compacta</i>                |
| 3     | 2.4                 | 5.9                 | 20             | <i>Lithodes murrayi</i> , <i>Sterechinus diadema</i> , <i>Admete specularis</i>            |
| 4     | -1.8                | 16.7                | 262            | <i>Bathybiaster loripes</i> , <i>Chorismus antarcticus</i> , <i>Colossendeis megalonyx</i> |
| 5     | -1.8                | 8.0                 | 78             | <i>Ammothea longispina</i> , <i>Rossella racovitzae</i> , <i>Sterechinus neumayeri</i>     |
| 6     | -1.8                | 4.8                 | 83             | <i>Munna antarctica</i> , <i>Laternula elliptica</i> , <i>Rossella antarctica</i>          |
| 7     | -0.3                | 1.6                 | 32             | <i>Paralomis formosa</i> , <i>Caryophyllia eltaninae</i> , <i>Chlanidota paucispiralis</i> |
| 8     | -1.8                | 1.6                 | 334            | <i>Adamussium colbecki</i> , <i>Glyptonotus antarcticus</i> , <i>Cellarinella nutti</i>    |
| 9     | -1.2                | 0.4                 | 5              | <i>Epimeria rubrieques</i> , <i>Falsimargarita thielei</i>                                 |
| 10    | -1.6                | 0.1                 | 11             | <i>Abatus (Pseudabatus) nimrodi</i> , <i>Carditella mawsoni</i>                            |

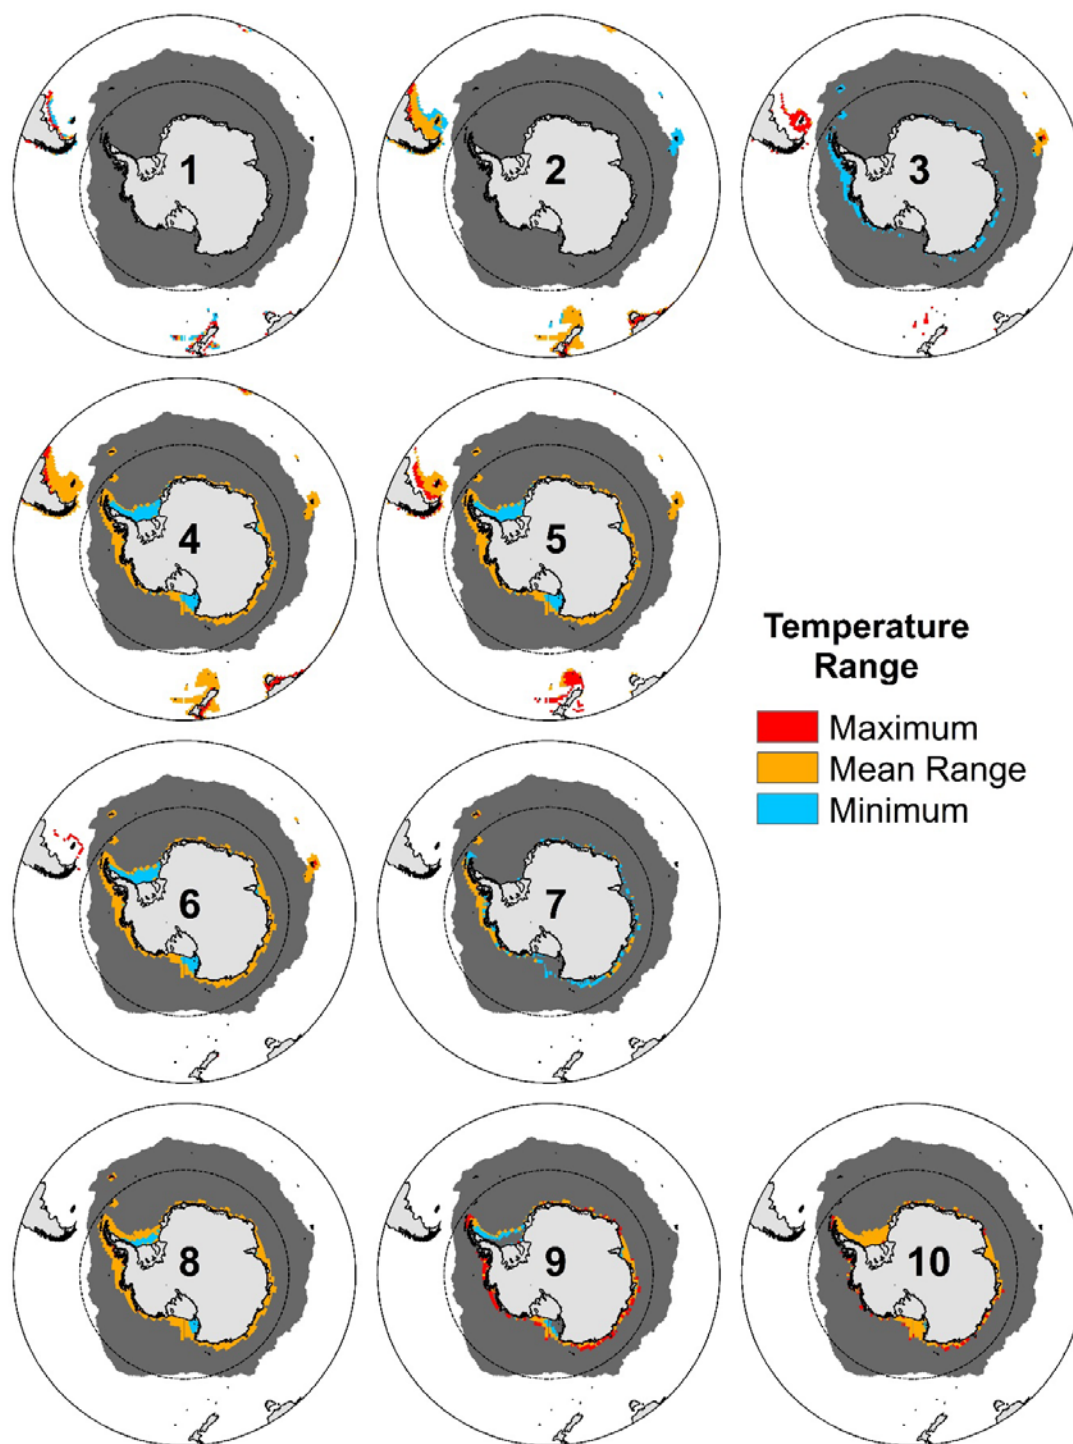

**Supplementary Figure 1.** Present-day potential range for groupings of seafloor invertebrates from south of 40 °S, grouped by >80% similarity in their thermal distribution patterns. Groupings are those illustrated in Figure 2 and Supplementary Table 2. Dashed line is 60 °S, grey area is south of the Polar Front (as defined by Moore et al., 1999).

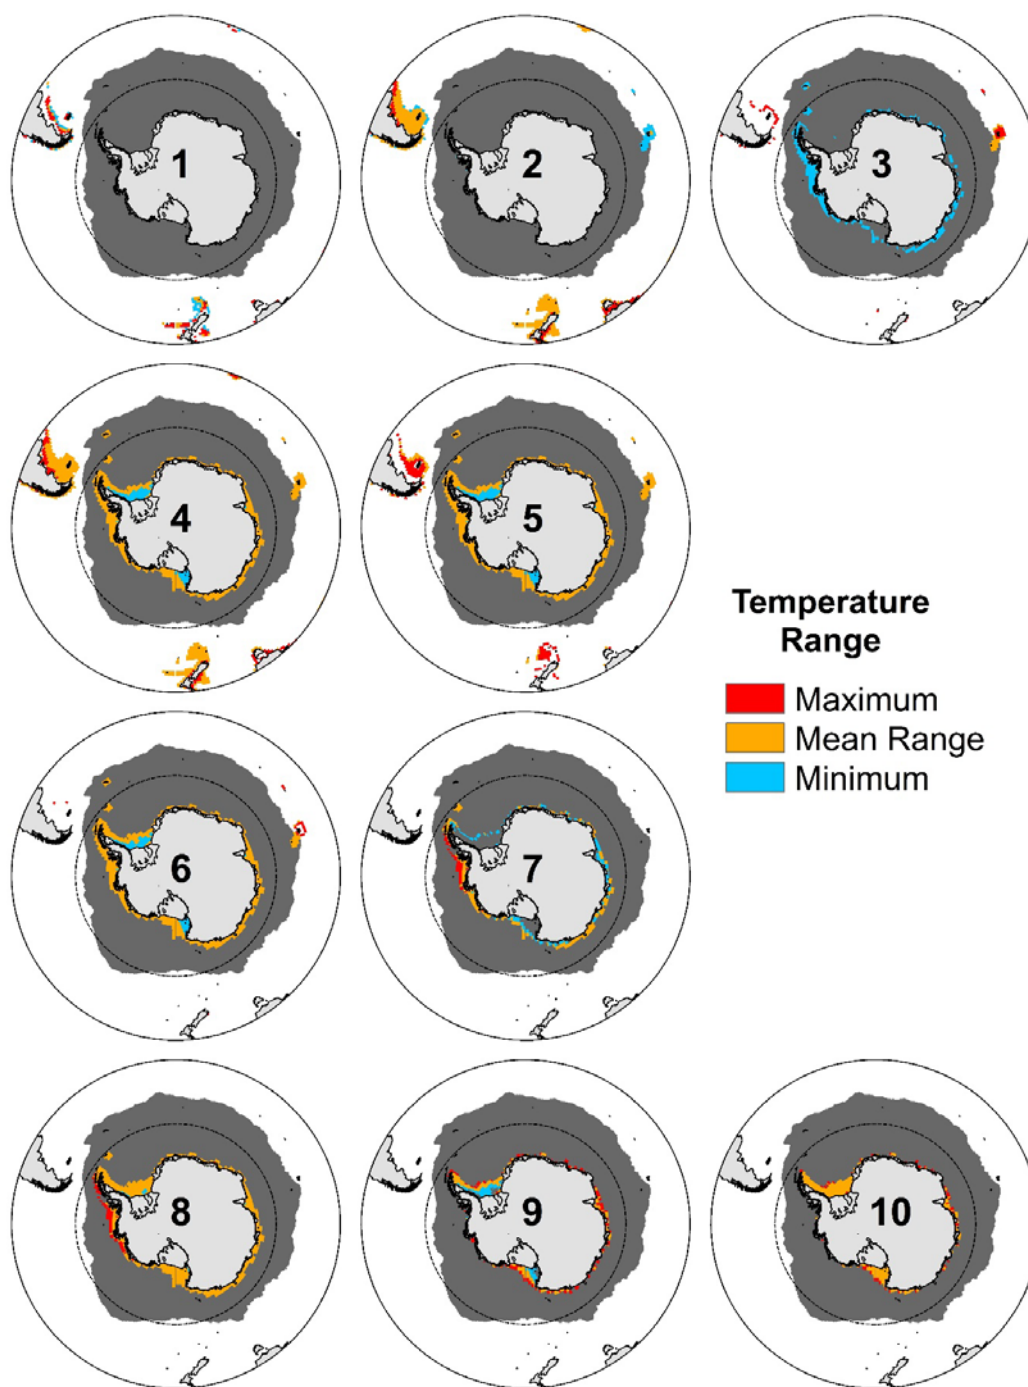

**Supplementary Figure 2.** 2099 potential range for each grouping of seafloor invertebrates from south of 40 °S, grouped by >80% similarity in their thermal distribution patterns (based upon suitable present day temperature ranges, using RCP8.5 mean ensemble projections). Groupings are those explained in Figure 2 and Supplementary Table 2. Dashed line is 60 °S, grey area is south of the Polar Front (as defined by Moore et al., 1999).

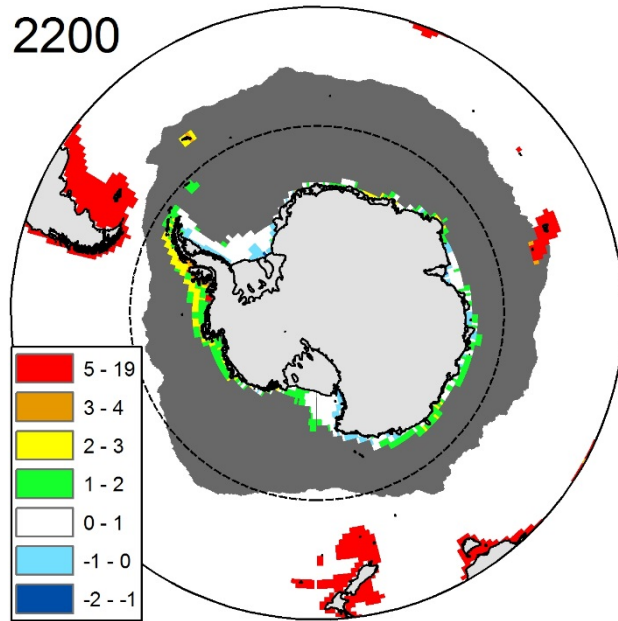

**Supplementary Figure 3.** Mean ensemble seafloor temperatures (°C) for 2200 under RCP8.5 projections. Dashed line is 60°S, grey area is south of the Polar Front (as defined by Moore et al., 1999).
